# Supplementary material
Source: Royal Society of Chemistry journal article supplement (doi:10.1039/d6an00234j)
Supplement: d6an00234j1.pdf [file d6an00234j1.pdf]

Supporting Information

**Ultramicroelectrodes fabrication guidelines for multifunctional scanning  
electrochemical microscopy**

Congshan Guo,<sup>a,b,c,d</sup> Zhizhen Lv,<sup>a,b,c,d</sup> Jigui Tang<sup>a,b,c,d</sup> and Jingshu Hui<sup>\*a,b,c,d</sup>

**Affiliations:**

<sup>a</sup> College of Energy, Soochow University, Suzhou, 215006, China.

<sup>b</sup> Soochow Institute for Energy and Materials Innovations, Suzhou, 215006, China.

<sup>c</sup> Key Laboratory of Advanced Carbon Materials and Wearable Energy Technologies  
of Jiangsu Province, Suzhou, 215006, China.

<sup>d</sup> Jiangsu Key Laboratory of Advanced Negative Carbon Technologies, Soochow  
University, Suzhou, 215123, China

Email: [jshui@suda.edu.cn](mailto:jshui@suda.edu.cn)

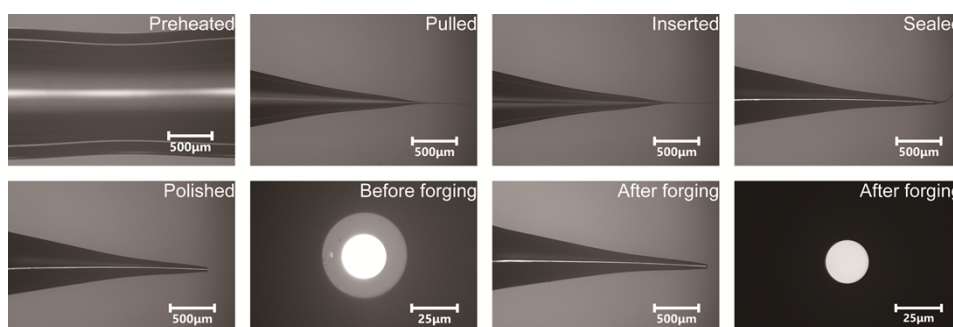

**Figure S1.** Fabrication and characterization of UME via a thick-wall nanopipette template and tip forging method, including the preheated and pulled capillary and the subsequent metal-inserted, sealed, and forged tip.

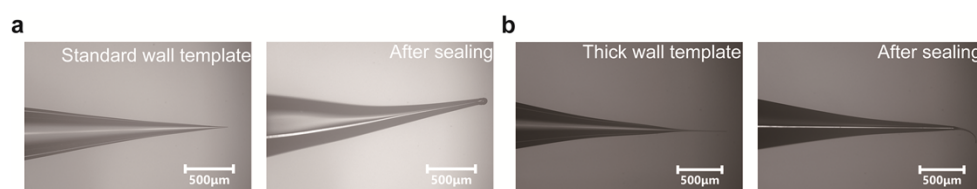

**Figure S2.** Bending effect during tip sealing process. **a**, Tip sealing using standard wall nanopipette template. **b**, Tip sealing using thick-wall nanopipette template.

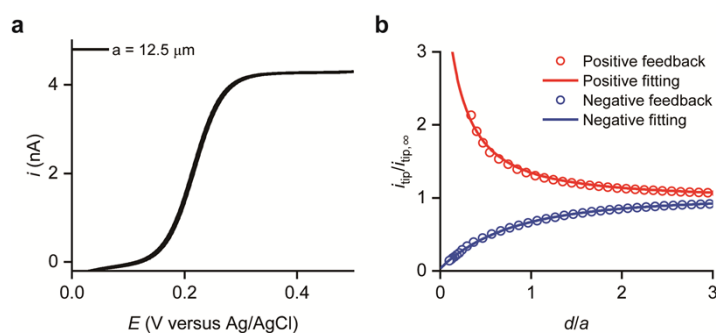

**Figure S3.** **a**, Steady-state voltammograms at a 12.5  $\mu\text{m}$ -radius platinum disk UME. The scan rate was 10  $\text{mV s}^{-1}$ . **b**, SECM approach curves recorded with the 5  $\mu\text{m}$ -radius platinum disk UME toward an insulating and a conductive substrate. The approach velocity was 0.2  $\mu\text{m s}^{-1}$ .

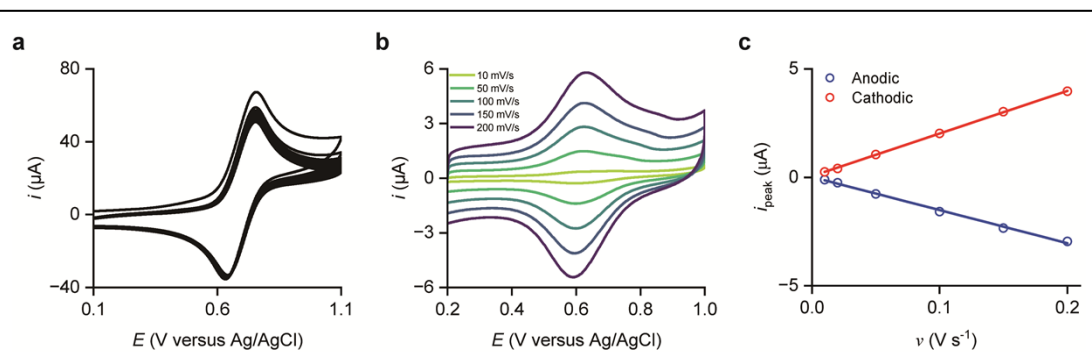

**Figure S4.** **a**, Electrografting of 4-amino-TEMPO molecule on GCE in PPB (pH = 7.5) solution. The scan rate was 0.1 V s<sup>-1</sup>. **b**, CVs of TEMPO-modified GCE at different scan rates in PPB (pH = 7.5) solution. **c**, Scan rate dependence of the anodic and cathodic peak current.

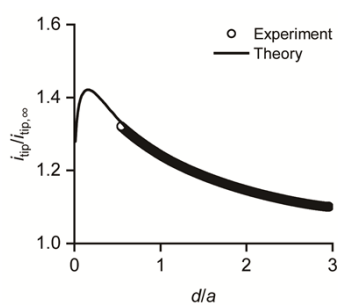

**Figure S5.** Approach curve of 12.5  $\mu$ m-radius platinum/gold DDE at the TEMPO-modified GCE. The approach curve was recorded at a velocity of 0.2  $\mu$ m·s<sup>-1</sup> using FcMeOH as the redox mediator.

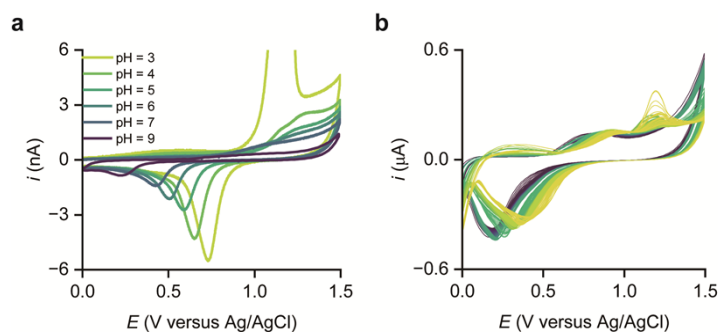

**Figure S6.** **a**, pH calibration of the gold pH sensor in PPB solution. **b**, In situ pH measurements of the gold pH sensor positioned 12  $\mu$ m above the substrate surface in 0.1 M KOH. The scan rate was 0.5 V s<sup>-1</sup>.

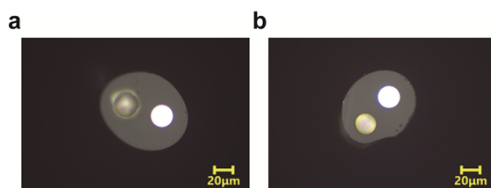

**Figure S7.** **a**, Optical micrograph of 12.5 μm-radius platinum disk/mercury sphere electrode. **b**, Optical micrograph of 12.5 μm-radius platinum disk/mercury disk electrode.

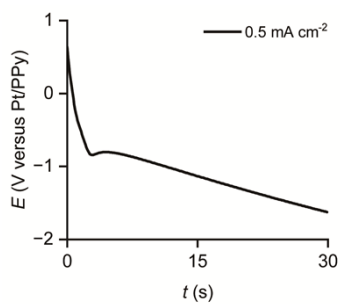

**Figure S8.** Lithium plating at copper using chronopotentiometry.

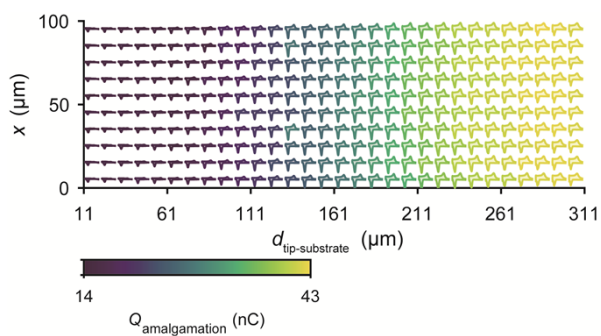

**Figure S9.** CV-SECM data of mercury disk during lithium plating at  $0.5 \text{ mA cm}^{-2}$ .

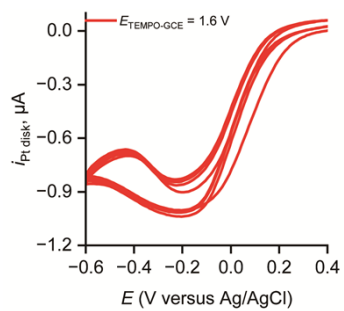

**Figure S10.** Voltammetric response of the platinum disk for  $\text{O}_2$  detection in 0.1 M KOH over five consecutive cycles at a tip-to-substrate distance of 12  $\mu\text{m}$ . The scan rate was  $0.5 \text{ V s}^{-1}$ . The substrate potential was 1.6 V versus Ag/AgCl.
